# Supplementary material
Source: publisher site journal article supplement (https://www.dovepress.com/article/362185)
Supplement: Supplementary file 1 [file get_supplementary_file.php]

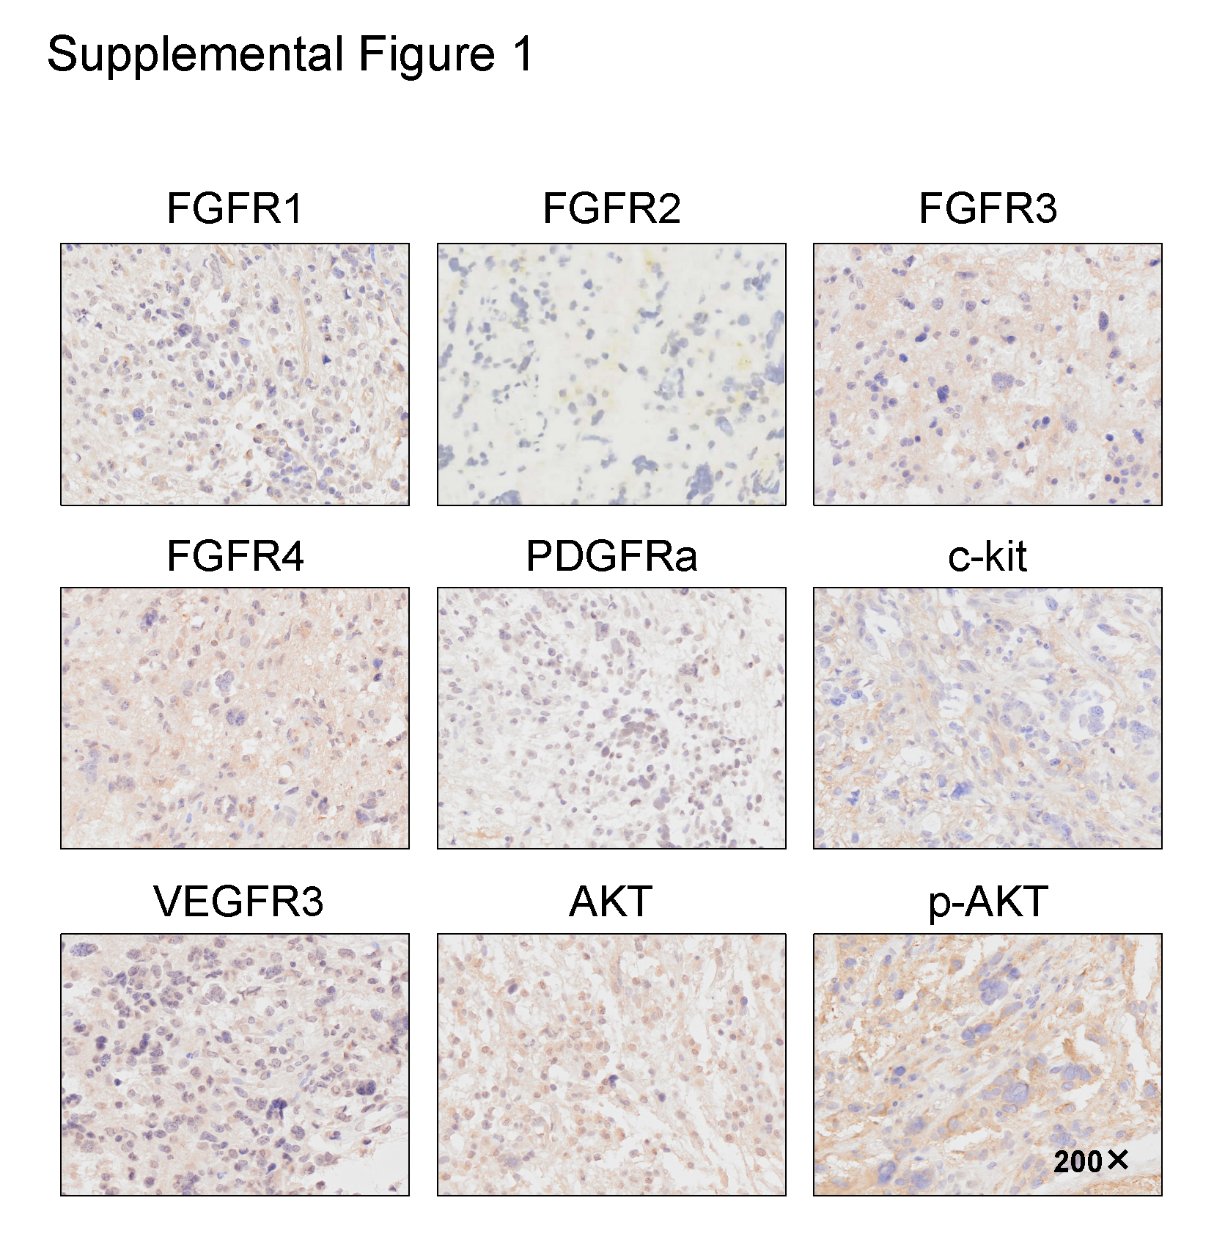
**Supplemental Figure 1.**

The immunohistochemical images showed the expression of anlotinib targets and AKT pathway.
